# Supplementary material for: Increasing the reference populations for the 55 AISNP panel: the need and benefits
Source: PubMed Central journal article supplement (PMC5491587; doi:10.1007/s00414-016-1524-z), 2017-01-09
Supplement: 414_2016_1524_MOESM1_ESM.pdf [file 414_2016_1524_MOESM1_ESM.pdf]

## Supplementary Material

Submitted to *International Journal of Legal Medicine* for paper titled:

“Increasing the reference populations for the 55 AISNP panel: the need and benefits”

Andrew J. Pakstis<sup>a</sup>, Longli Kang<sup>b</sup>, Lijun Liu<sup>b</sup>, Zhiying Zhang<sup>b</sup>, Tianbo Jin<sup>b</sup>, Elena Grigorenko<sup>c</sup>, Frank R. Wendt<sup>d</sup>, Bruce Budowle<sup>e</sup>, Sibte Hadi<sup>f</sup>, Mariam Salam Al Qahtani<sup>f</sup>, Niels Morling<sup>g</sup>, Helle Smidt Mogensen<sup>g</sup>, Goncalo E. Themudo<sup>g</sup>, Usha Soundararajan<sup>a</sup>, Haseena Rajeevan<sup>a</sup>, Judith R. Kidd<sup>a</sup>, Kenneth K. Kidd<sup>a</sup>

<sup>a</sup> Department of Genetics, Yale University School of Medicine, New Haven, CT 06520 USA

<sup>b</sup> Key Laboratory for Molecular Genetic Mechanisms and Intervention Research on High Altitude Disease of Tibet Autonomous Region *and* Key Laboratory of High Altitude Environment and Genes Related to Disease of Tibet Ministry of Education, School of Medicine, Xizang Minzu University, Xianyang, Shaanxi 712082, China

<sup>c</sup> Developmental Cognitive Neuroscience, University of Houston, Houston, TX 77204 USA

<sup>d</sup> Institute of Molecular Medicine, University of North Texas Health Science Center, 3500 Camp Bowie Blvd. Fort Worth, TX 76107, USA

<sup>e</sup> Center for Human Identification, University of North Texas Health Science Center, 3500 Camp Bowie Blvd, Fort Worth, Texas 76107 USA; Center of Excellence in Genomic Medicine Research, King Abdelaziz University, Jeddah, Saudi Arabia

<sup>f</sup> School of Forensic & Applied Sciences, University of Central Lancashire, Preston, UK

<sup>g</sup> Section of Forensic Genetics, Department of Forensic Medicine, University of Copenhagen, DK-2100, Copenhagen, Denmark

**Table S1.** The 139 population samples in STRUCTURE analyses ordered as in bar graph Figure 1.

| <b>N<sup>a</sup><br/>Indiv.</b> | <b>World<br/>Region</b> | <b>Abbrev.</b> | <b>Population Name<sup>b</sup></b> | <b>Data Source<br/>For Genotypes<sup>c</sup></b> |
|---------------------------------|-------------------------|----------------|------------------------------------|--------------------------------------------------|
| 69                              | SubSahara               | BIA            | Biaka                              | Kidd Lab                                         |
| 39                              |                         | MBU            | Mbuti                              | Kidd Lab                                         |
| 8                               |                         | LIS            | Lisongo                            | Kidd Lab                                         |
| 113                             |                         | GWD            | Gambians                           | 1KG                                              |
| 85                              |                         | MSL            | Mende                              | 1KG                                              |
| 99                              |                         | ESN            | Esan                               | 1KG                                              |
| 77                              |                         | YOR            | Yoruba                             | Kidd Lab                                         |
| 108                             |                         | YRI            | Yoruba                             | 1KG                                              |
| 48                              |                         | IBO            | Ibo                                | Kidd Lab                                         |
| 39                              |                         | HSA            | Hausa                              | Kidd Lab                                         |
| 99                              |                         | LWK            | Luhya                              | 1KG                                              |
| 45                              |                         | CGA            | Chagga                             | Kidd Lab                                         |
| 20                              |                         | MAS            | Masai                              | Kidd Lab                                         |
| 40                              |                         | SND            | Sandawe                            | Kidd Lab                                         |
| 40                              |                         | ZRM            | Zaramo                             | Kidd Lab                                         |
| 89                              |                         | AAM            | African Americans                  | Kidd Lab                                         |
| 61                              |                         | ASW            | African Americans                  | 1KG                                              |

|     |           |     |                       |          |
|-----|-----------|-----|-----------------------|----------|
| 45  |           | ETJ | Ethiopian Jews        | Kidd Lab |
| 20  |           | SOM | Somali                | Kidd Lab |
| 11  | N Africa  | NBR | Nebeur                | Kidd Lab |
| 43  |           | KSR | Kesra                 | Kidd Lab |
| 46  |           | KRN | Kairoun               | Kidd Lab |
| 47  |           | SOU | Sousse                | Kidd Lab |
| 40  |           | MHD | Mehdia                | Kidd Lab |
| 46  |           | KRK | Kerkennah             | Kidd Lab |
| 62  |           | SMR | Smar                  | Kidd Lab |
| 70  |           | LYB | Libyans               | Kidd Lab |
| 42  | SW Asia   | YMJ | Yemenite Jews         | Kidd Lab |
| 91  |           | SAU | Saudi                 | Kidd Lab |
| 38  |           | UAE | Arabs, Abu Dhabi, UAE | S. Hadi  |
| 14  |           | KWT | Kuwaiti               | Kidd Lab |
| 69  |           | PLA | Palestinians          | Kidd Lab |
| 102 |           | DRU | Druze                 | Kidd Lab |
| 39  |           | SAM | Samaritans            | Kidd Lab |
| 59  |           | CYP | Turkish Cypriots      | Kidd Lab |
| 80  |           | TRK | Turkish               | Kidd Lab |
| 44  |           | IRN | Iranians              | Kidd Lab |
| 35  | S Europe  | SRD | Sardinians            | Kidd Lab |
| 27  |           | RMJ | Roman Jews            | Kidd Lab |
| 107 |           | IBS | Iberians              | 1KG      |
| 107 |           | TSI | Toscani               | 1KG      |
| 55  |           | GRK | Greeks                | Kidd Lab |
| 140 |           | ASH | Ashkenazi             | Kidd Lab |
| 54  |           | ADY | Adygei                | Kidd Lab |
| 42  | N Europe  | CHV | Chuvash               | Kidd Lab |
| 89  |           | HGR | Hungarians            | Kidd Lab |
| 33  |           | RUA | Russians, Archangelsk | Kidd Lab |
| 47  |           | RUV | Russians, Vologda     | Kidd Lab |
| 89  |           | EAM | European Americans    | Kidd Lab |
| 91  |           | GBR | British               | 1KG      |
| 99  |           | CEU | CEPH Europeans        | 1KG      |
| 114 |           | IRI | Irish                 | Kidd Lab |
| 51  |           | DAN | Danes                 | Kidd Lab |
| 34  |           | FIN | Finns                 | Kidd Lab |
| 99  |           | FN1 | Finns                 | 1KG      |
| 47  | W Siberia | KMZ | Komi Zyriane          | Kidd Lab |
| 52  | SC Asia   | MHN | Mohanna               | Kidd Lab |
| 26  |           | MKR | Makrani               | Kidd Lab |
| 122 |           | PTH | Pathans               | Kidd Lab |
| 96  |           | PJL | Punjabi               | 1KG      |
| 30  |           | KER | Keralites             | Kidd Lab |
| 14  |           | THT | Thoti                 | Kidd Lab |
| 103 |           | GIH | Gujarati              | 1KG      |
| 102 |           | ITU | Telugu                | 1KG      |
| 102 |           | STU | Tamil (Sri Lanka)     | 1KG      |
| 86  |           | BEB | Bengali               | 1KG      |
| 17  |           | KCH | Kachari               | Kidd Lab |
| 104 |           | HZR | Hazara                | Kidd Lab |
| 20  | C Asia    | TJK | Tajik                 | C.-X. Li |
| 45  |           | KAZ | Kazakhs               | H. Li    |

|     |           |     |                          |          |
|-----|-----------|-----|--------------------------|----------|
| 30  |           | KZK | Kazakhs                  | C.-X. Li |
| 46  |           | UIG | Uyghur                   | H. Li    |
| 30  |           | UGR | Uyghur                   | C.-X. Li |
| 100 |           | YGR | Uyghur                   | L. Kang  |
| 30  |           | KRG | Kirghiz,                 | C.-X. Li |
| 50  | E Siberia | KTY | Khanty                   | Kidd Lab |
| 51  |           | YAK | Yakut                    | Kidd Lab |
| 51  | E Asia    | TSA | Tsaatan                  | Kidd Lab |
| 71  |           | OMG | Outer Mongolians         | Kidd Lab |
| 68  |           | IMG | Inner Mongolians         | H. Li    |
| 100 |           | MGL | Inner Mongolians         | L. Kang  |
| 29  |           | XBO | Xibo, Xinjiang           | C.-X. Li |
| 26  |           | TUQ | Tu, Qinghai              | C.-X. Li |
| 100 |           | HUI | Hui, Ningxia             | L. Kang  |
| 54  |           | KOR | Koreans                  | Kidd Lab |
| 34  |           | KRS | Koreans                  | C.-X. Li |
| 48  |           | JPN | Japanese                 | Kidd Lab |
| 104 |           | JPT | Japanese                 | 1KG      |
| 100 |           | HNW | Han, Northwest           | L. Kang  |
| 103 |           | CHB | Han, Beijing             | 1KG      |
| 47  |           | HSH | Han, Shandong            | C.-X. Li |
| 100 |           | HSW | Han, Southwest           | L. Kang  |
| 58  |           | CHS | Chinese, "Cantonese"     | Kidd Lab |
| 50  |           | CHT | Han, Taiwan              | Kidd Lab |
| 105 |           | HCS | Southern Han             | 1KG      |
| 41  |           | HKA | Hakka                    | Kidd Lab |
| 50  |           | HKK | Hakka                    | C.-X. Li |
| 40  |           | HGD | Han, Guangdong           | C.-X. Li |
| 28  |           | HJX | Han, Guangxi             | C.-X. Li |
| 56  |           | TEO | Han, Teochew speakers    | C.-X. Li |
| 30  | SW China  | KHG | Khamba Tibetans, Sichuan | H. Li    |
| 100 |           | TBS | Tibetans                 | C.-X. Li |
| 50  |           | TBT | Tibetans                 | L. Kang  |
| 39  |           | QMR | Qiang, Sichuan           | H. Li    |
| 42  |           | BQY | Baima Dee, Sichuan       | H. Li    |
| 26  |           | YIS | Yi, Sichuan              | C.-X. Li |
| 29  |           | VAY | Va, Yunnan               | C.-X. Li |
| 16  |           | VAB | Va, Myanmar              | C.-X. Li |
| 30  |           | DAI | Dai, Yunnan              | C.-X. Li |
| 23  |           | BAI | Bai, Yunnan              | C.-X. Li |
| 25  | SE Asia   | MAO | Miao=Hmong, Guangxi      | C.-X. Li |
| 100 |           | HMO | Miao=Hmong, Guizhou      | L. Kang  |
| 28  |           | DNG | Dong, Guangxi            | C.-X. Li |
| 27  |           | JNG | Jing, Gunagxi            | C.-X. Li |
| 100 |           | LIH | Li = Hlai, Hainan        | L. Kang  |
| 93  |           | CDX | Dai                      | 1KG      |
| 99  |           | KHV | Vietnamese               | 1KG      |
| 118 |           | LAO | Laotians                 | Kidd Lab |
| 24  |           | CBD | Cambodians               | Kidd Lab |
| 40  |           | AMI | Ami, Taiwan              | Kidd Lab |
| 42  |           | ATL | Atayal, Taiwan           | Kidd Lab |
| 11  |           | MLY | Malaysians               | Kidd Lab |
| 9   | Pacific   | SMO | Samoans                  | Kidd Lab |

|     |           |     |                       |                      |
|-----|-----------|-----|-----------------------|----------------------|
| 34  |           | MCR | Micronesians          | Kidd Lab             |
| 22  |           | PNG | Papuans, New Guinea   | Kidd Lab             |
| 23  |           | NAS | Nasioi                | Kidd Lab             |
| 51  |           | AUN | Australian Aborigines | Kidd Lab             |
| 104 | Greenland | GRN | Greenlanders          | N. Morling           |
| 56  | Americas  | NPA | Plains AmerIndians    | Kidd Lab             |
| 51  |           | SWA | Southwest AmerIndians | Kidd Lab             |
| 62  |           | YVP | Yavapai               | F. Wendt, B. Budowle |
| 53  |           | PMX | Pima, Mexico          | Kidd Lab             |
| 50  |           | MAY | Maya, Yucatan         | Kidd Lab             |
| 12  |           | GHB | Guihiba               | Kidd Lab             |
| 85  |           | PEL | Peruvians             | 1KG                  |
| 22  |           | QUE | Quechua               | Kidd Lab             |
| 65  |           | TIC | Ticuna                | Kidd Lab             |
| 43  |           | SUR | Rondonian Surui       | Kidd Lab             |
| 55  |           | KAR | Karitiana             | Kidd Lab             |

**Table S1 footnotes:**

<sup>a</sup> Sample sizes here correspond to the number of individuals included in STRUCTURE analyses.

<sup>b</sup> See Table 1 footnotes for more details on sample collection and genotyping for the 15 newest reference population samples. See footnotes in Table S1 of [5] Pakstis et al. (2015) for information concerning sources for collection of previously contributed reference population samples.

<sup>c</sup> 1KG abbreviation stands for the 1000 Genomes Project--Phase 3.
